# Supplementary figures and images for: Metal-free cysteamine-functionalized graphene alleviates mutual interferences in heavy metal electrochemical detection
Source: Royal Society of Chemistry journal article supplement (doi:10.1039/d2gc02978b), 2023-01-01

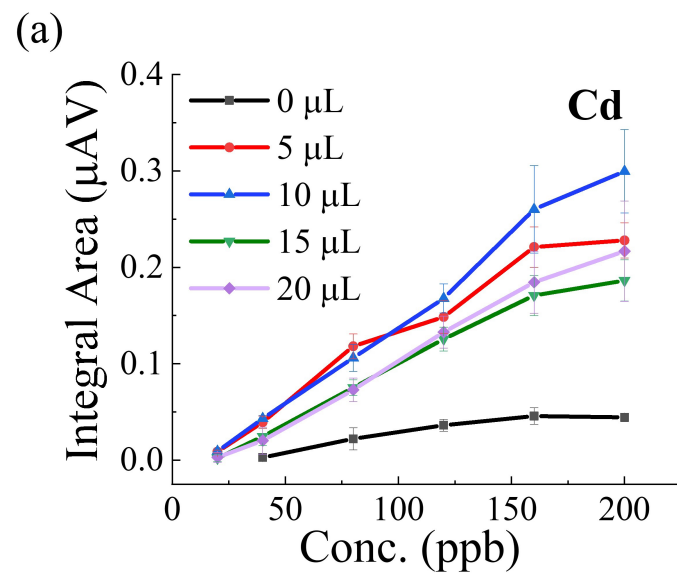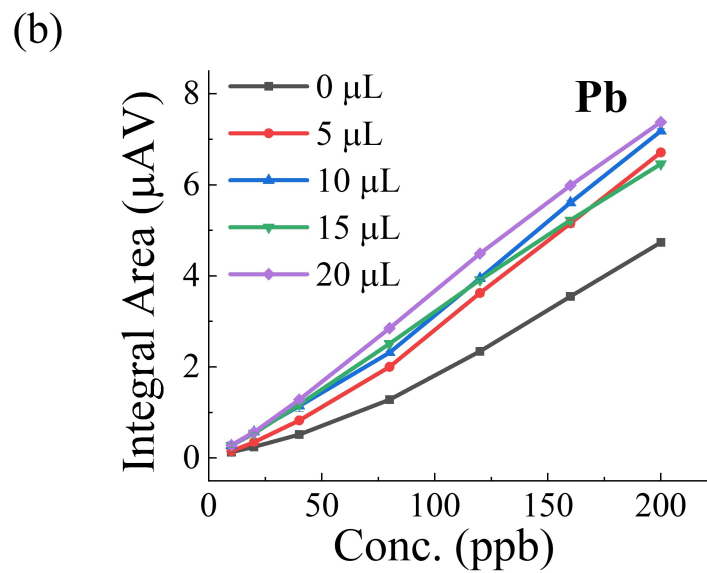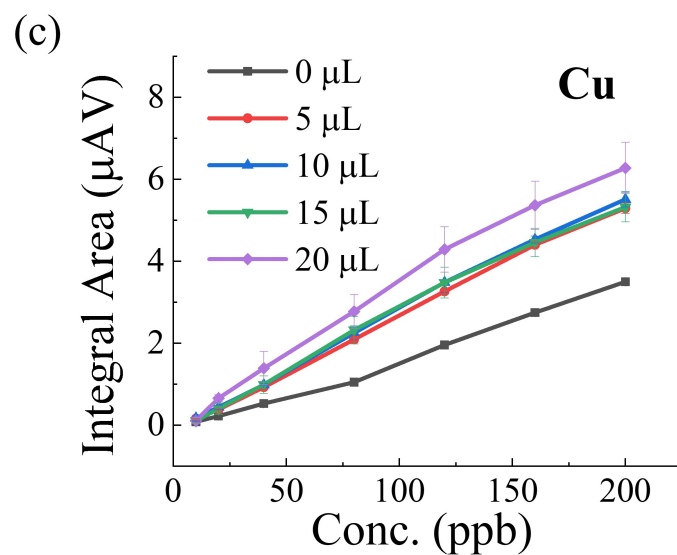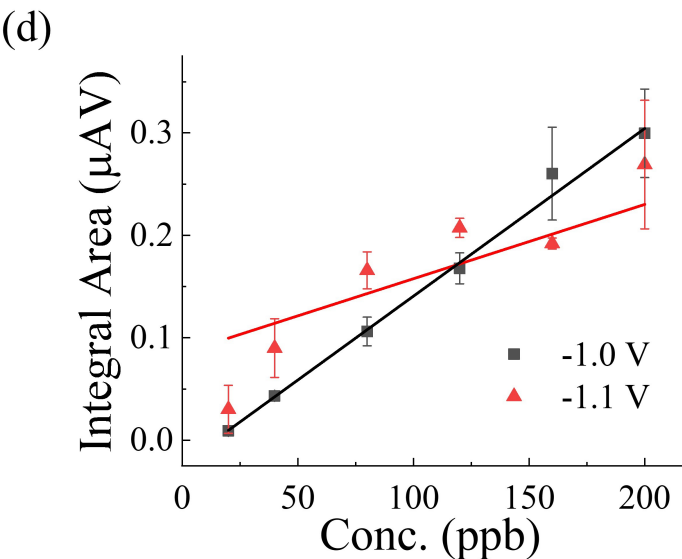

Supplement: d2gc02978b1.pdf [file d2gc02978b1.pdf]
